# Supplementary material for: Direct growth of ZnO nanowire arrays on UV-irradiated graphene
Source: Royal Society of Chemistry journal article supplement (doi:10.1039/c5ce01619c), 2015-01-01
Supplement: c5ce01619c1.pdf [file c5ce01619c1.pdf]

## Supporting Information

# Direct growth of ZnO nanowire arrays on UV-irradiated graphene

Ming-Yen Lu<sup>a,b,\*</sup>, Yen-Min Ruan<sup>a,b</sup>, Cheng-Yao Chiu<sup>a,b</sup>, Ya-Ping Hsieh<sup>a</sup>, and Ming-Pei Lu<sup>c</sup>

<sup>a</sup> Graduate Institute of Opto-Mechatronics, National Chung Cheng University, Chia-Yi 62102, Taiwan

<sup>b</sup> Advanced Institute of Manufacturing with High-Tech Innovations, National Chung Cheng University, Chia-Yi 62102, Taiwan

<sup>c</sup> National Nano Device Laboratories, Hsinchu 300, Taiwan

Corresponding author: [mylu@ccu.edu.tw](mailto:mylu@ccu.edu.tw)

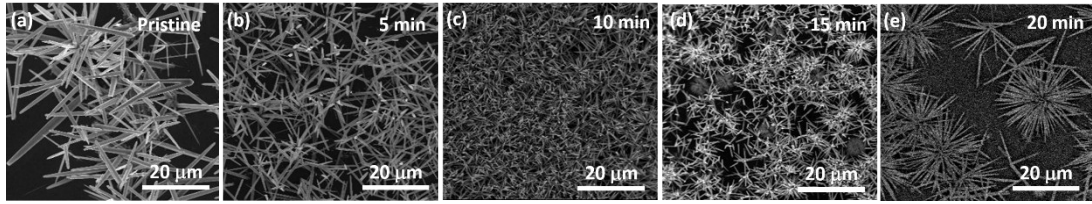

Figure S1. Top-view FE-SEM images of ZnO NWs on graphene samples that had been UV-irradiated for (a) 0, (b) 5, (c), 10, (d) 15, and (e) 20 min.

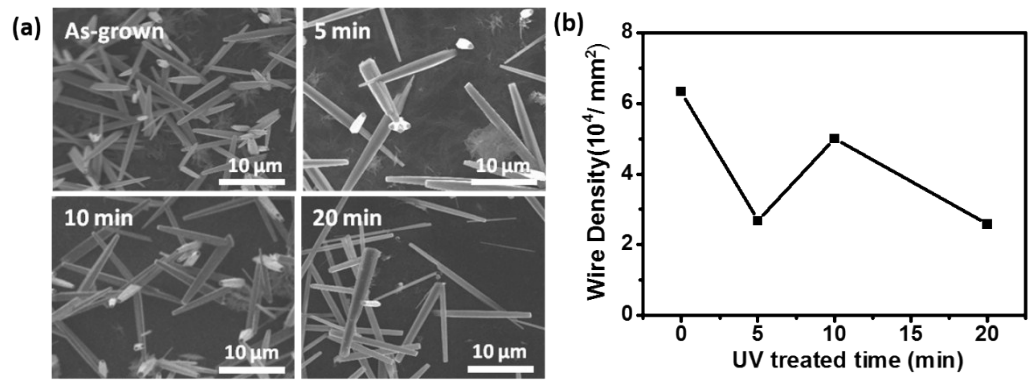

Figure S2. (a) SEM images of ZnO NW arrays grown on unseeded UV-treated graphene for different durations. (b) Densities of ZnO NWs grown on graphene substrates UV-irradiated for various lengths of time.

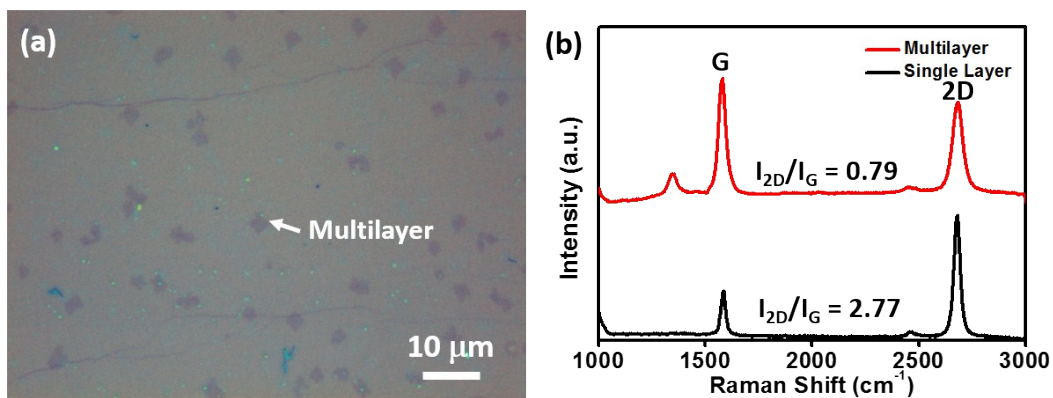

Figure S3. (a) OM image of pristine graphene on a SiO<sub>2</sub> substrate; most of the substrate is covered with single-layer graphene, with less than 10% of the sample area being multilayer graphene (darker areas). (b) Raman spectra of single-layer and multilayer graphene, revealing  $I_{2D}/I_G$  ratios of approximately 2.77 and 0.79, respectively.

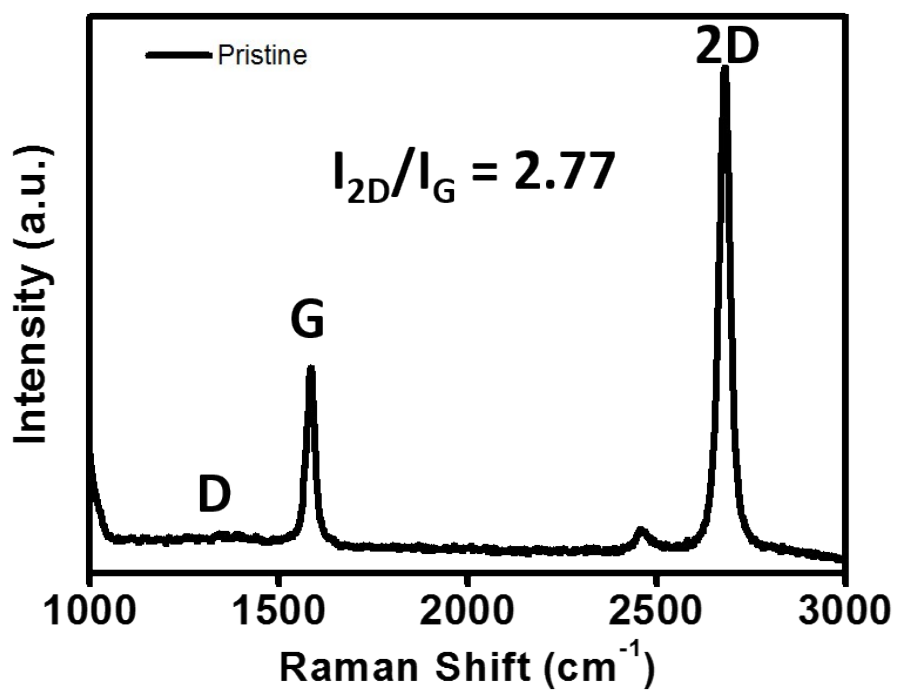

Figure S4. Raman spectrum of pristine graphene; the  $I_{2D}/I_G$  ratio (ca. 2.77) implies that this graphene was of the single-layer type.

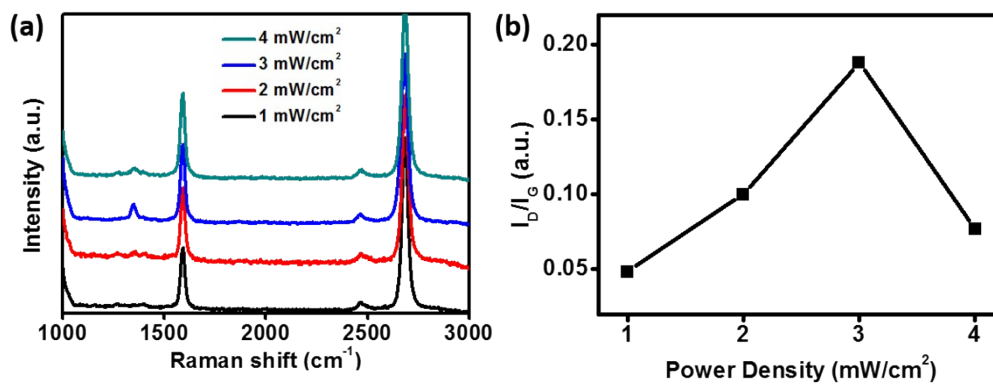

Figure S5. (a) Raman spectra and (b)  $I_D/I_G$  ratios of graphene that had been subjected to UV irradiation for 10 min at power densities of 1, 2, 3, and 4 mW/cm<sup>2</sup>.

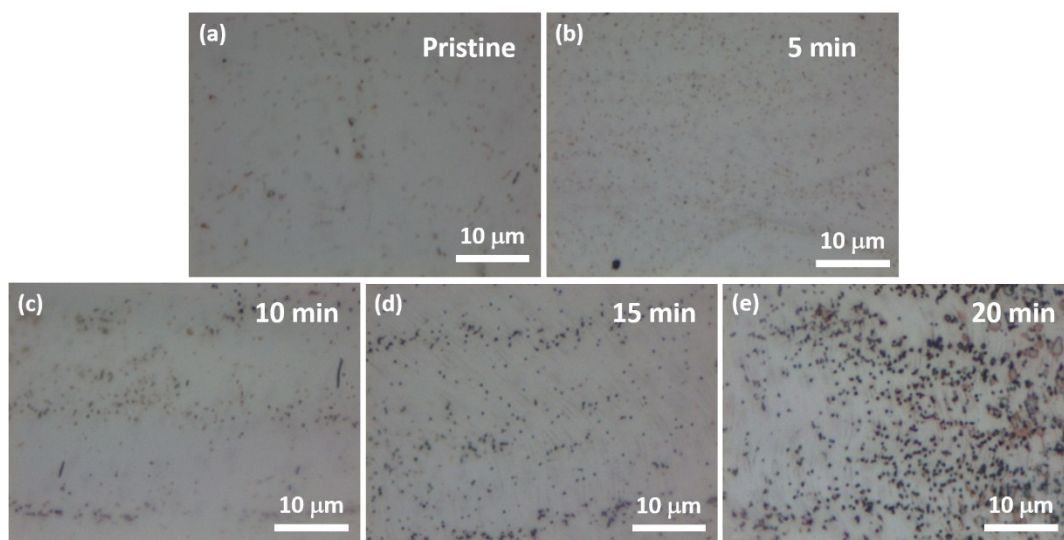

Fig. S6 OM images of (a) non-irradiated and UV-irradiated for (b) 5 min, (c) 10 min, (d) 15 min, and (e) 20 min graphene/Cu substrates. The samples were dipped with Cu etchant to form etching pits (dark dots) on the Cu surface.
